# Supplementary material for: Temperature Estimation during Pulsed Laser Sintering of Silver Nanoparticles
Source: MDPI journal article supplement (doi:10.3390/app12073467), 2022-03-29
Supplement: s1 [file s1]

# Temperature Estimation during Pulsed Laser Sintering of Silver Nanoparticles

Arif Hussain <sup>1</sup>, Hee-Lak Lee <sup>1</sup>, Yoon-Jae Moon <sup>1,2</sup>, Jun-Young Hwang <sup>2</sup>, HeuiseokKang <sup>2</sup>, and Seung-Jae Moon <sup>1,\*</sup>

<sup>1</sup> Department of Mechanical Convergence Engineering, Hanyang University, Seoul 04763, Korea; enggaskari@gmail.com (A.H.); joylee1112@hanyang.ac.kr (H.-L.L.); myj3235@kitech.re.kr (Y.-J.M.)

<sup>2</sup> Korea Institute of Industrial Technology, Ansan 15588, Korea; hskang@kitech.re.kr

\* Correspondence: smoon@hanyang.ac.kr (S.-J.M.); jyhwan@kitech.re.kr (J.-Y.H.)

## Supplementary Information

$$h = \begin{cases} 0.54 \frac{k}{L} Ra_L^{1/4} & T > T_{\text{ext}}, \quad 10^4 \leq Ra_L \leq 10^7 \\ 0.15 \frac{k}{L} Ra_L^{1/3} & T > T_{\text{ext}}, \quad 10^7 \leq Ra_L \leq 10^{11} \\ 0.27 \frac{k}{L} Ra_L^{1/4} & T \leq T_{\text{ext}}, \quad 10^5 \leq Ra_L \leq 10^{10} \end{cases} \quad (\text{S1})$$

**Equation S1.** Convection heat transfer coefficient  $h$  used in the numerical model, where,  $k$ ,  $L$ , and  $Ra_L$  are thermal conductivity, characteristic length, and Rayleigh number, respectively.

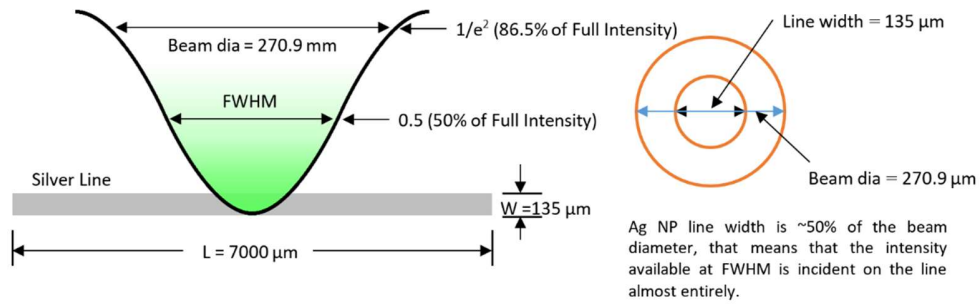

**Figure S1.** Illustration of a Gaussian Beam profile which depicts the chosen beam diameter (270.9 μm) selected for the pulsed laser operation in comparison to the printed Ag NP line width of 135 μm.

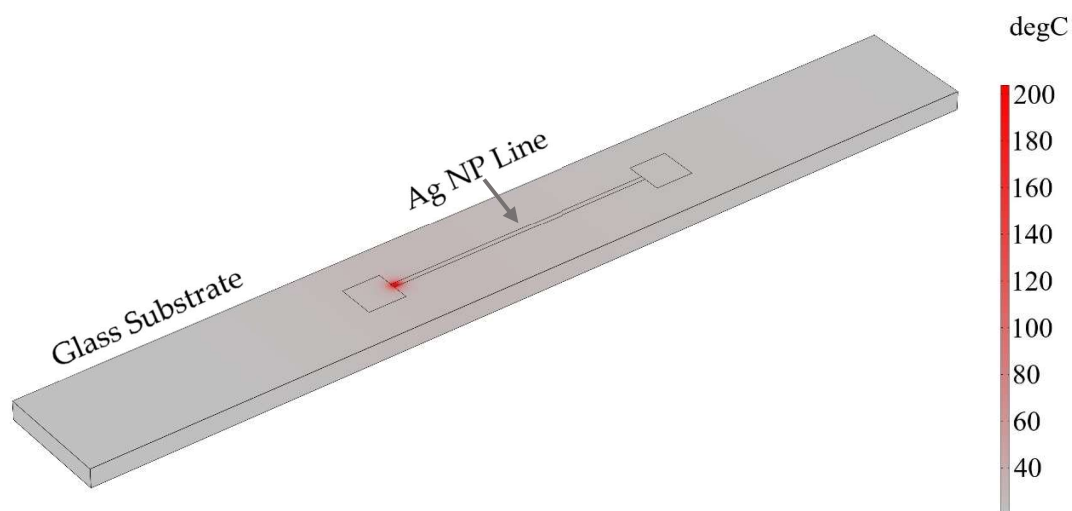

**Figure S2.** 3-D model used for the temperature estimation during pulsed laser sintering of inkjet-printed Ag NP line on a glass substrate.

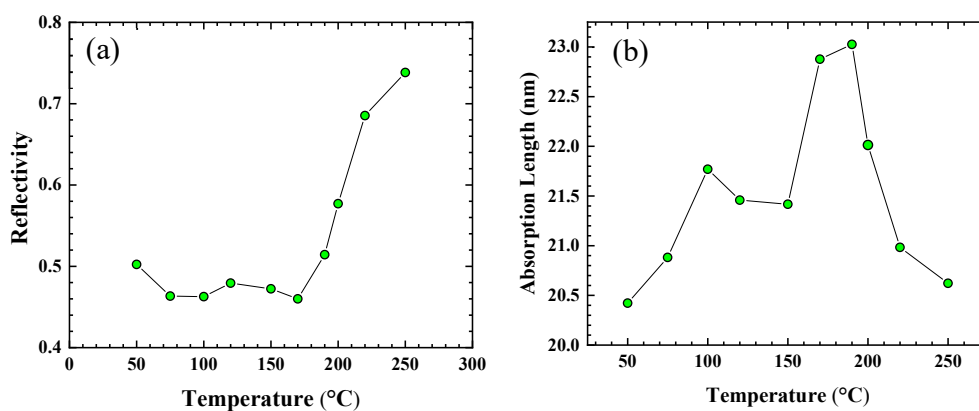

**Figure S3.** Normal Reflectivity and Absorption length of Ag NP structures measured with ellipsometry at different sintering temperature.

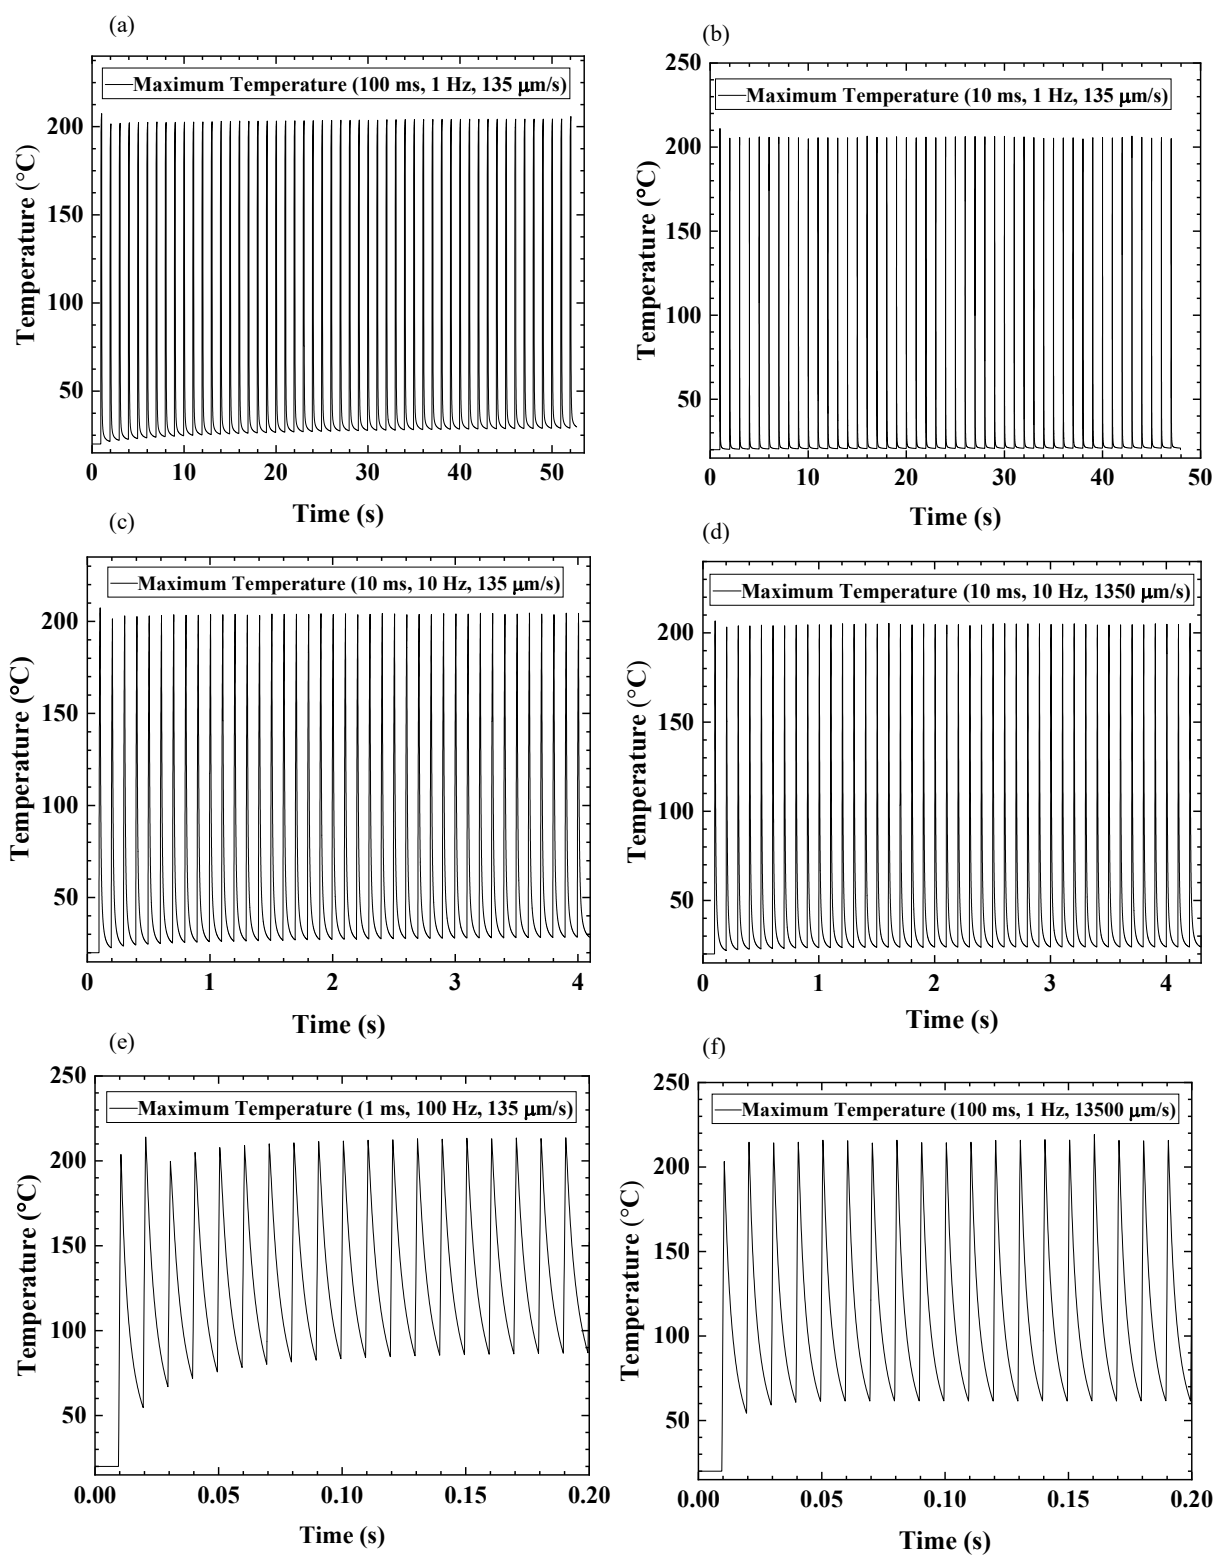

**Figure S4.** Maximum temperature plots for (a) 100 ms, 1 Hz, 135  $\mu\text{m/s}$ , 276 mW (b) 10 ms 1 Hz and 135  $\mu\text{m/s}$ , 276 mW. (c) 10 ms, 10 Hz, 135  $\mu\text{m/s}$  and 420 mW (d) 10 ms, 10 Hz, 1350  $\mu\text{m/s}$  and 420 mW (e) 1 ms, 100 Hz, 135  $\mu\text{m/s}$  and 1.7 W (f) 1 ms, 100 Hz, 13500  $\mu\text{m/s}$  and 1.7 W.
